# Supplementary material for: PISMA: A Visual Representation of Motif Distribution in DNA Sequences
Source: PubMed Central journal article supplement — Bioinform Biol Insights. 2017 Mar 30;11:1177932217700907. doi: 10.1177/1177932217700907 (PMC5390925; doi:10.1177/1177932217700907), 2017-03-30

# GENE MAPS AND CpG SITES DISTRIBUTION IN GENOMES OF 92 HPV TYPES

## HPV 1

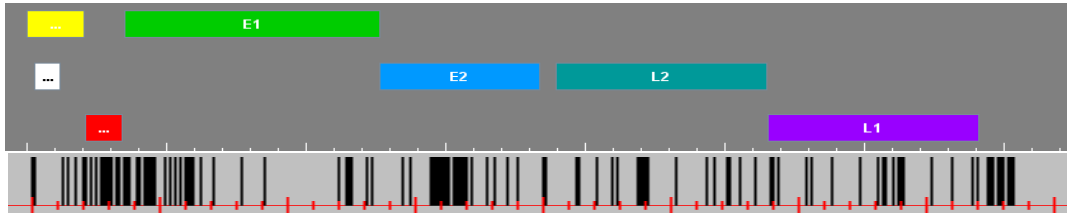

## HPV 2

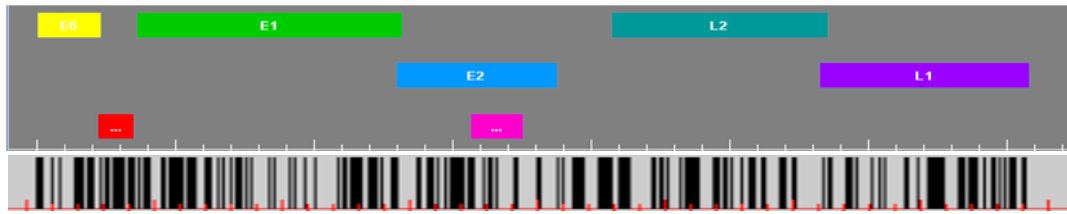

## HPV 3

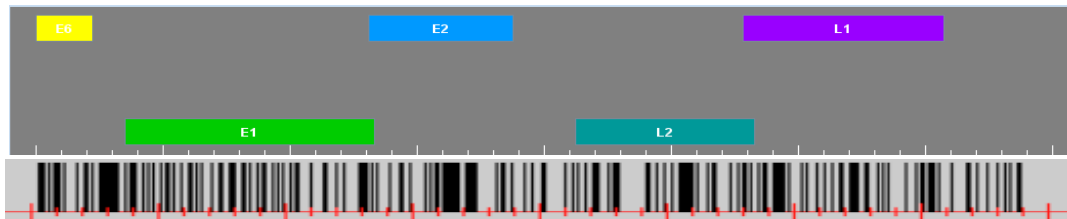

## HPV 4

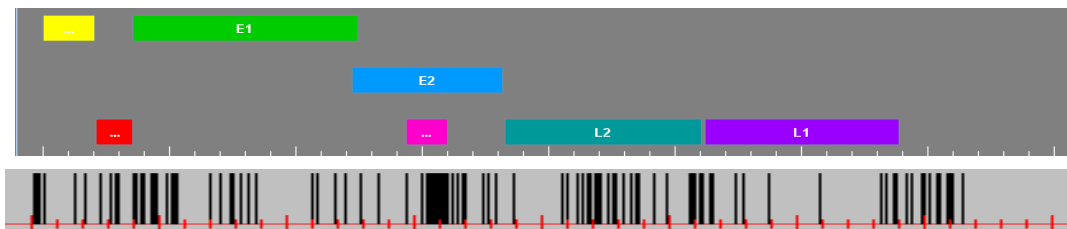

## HPV 5

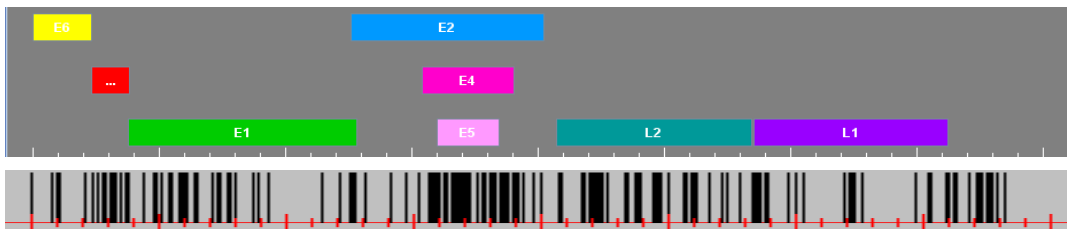

## HPV 6

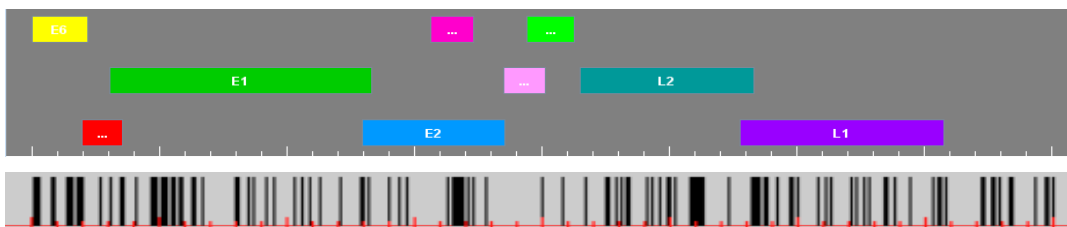

### HPV 7

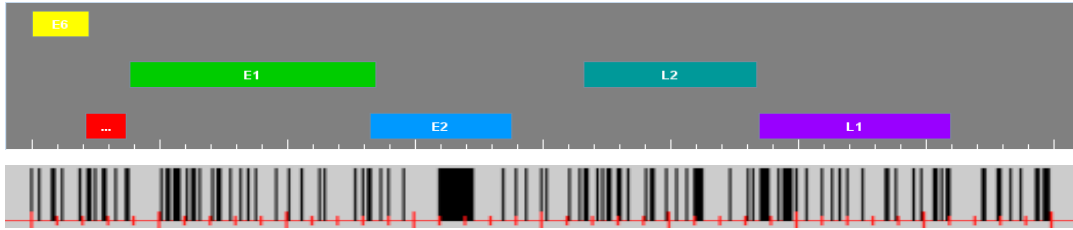

### HPV 8

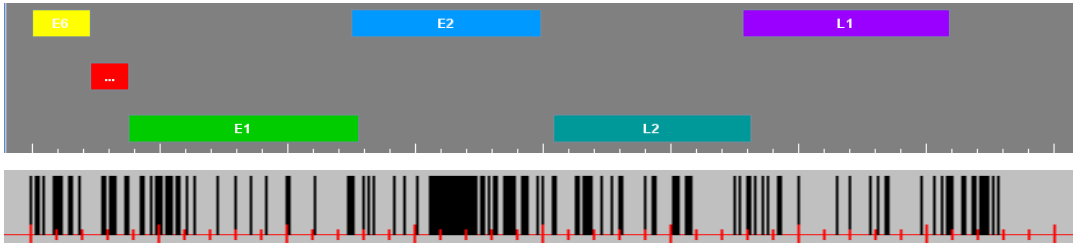

### HPV 9

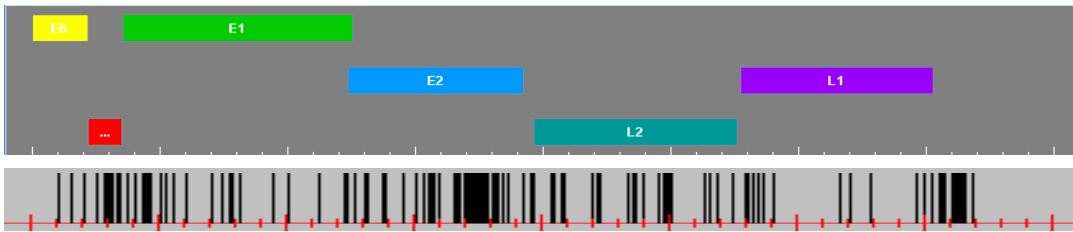

### HPV 10

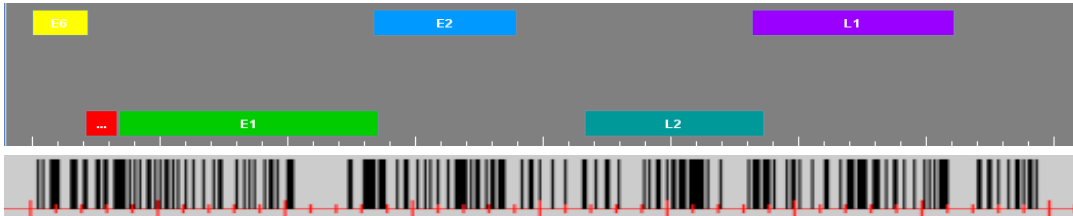

### HPV 11

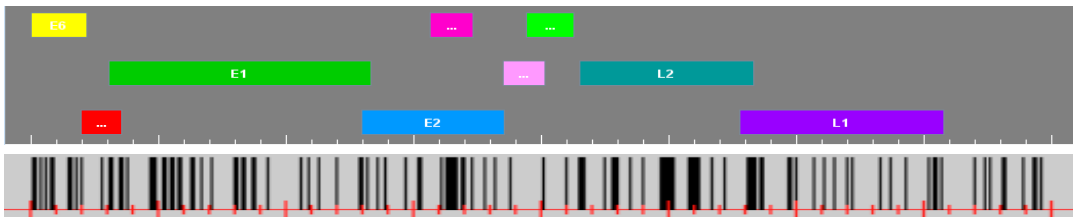

### HPV 12

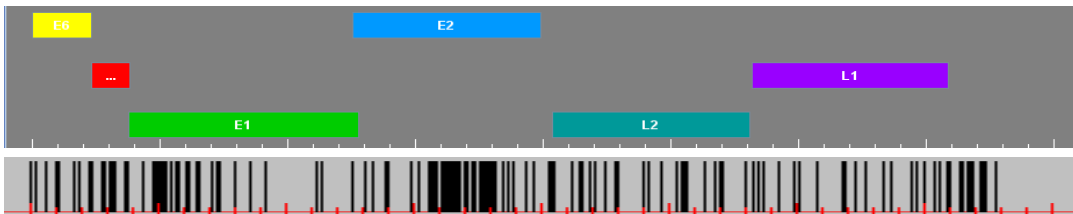

### HPV 13

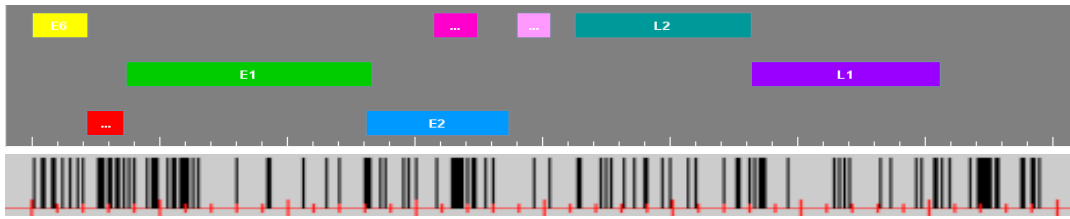

### HPV 14

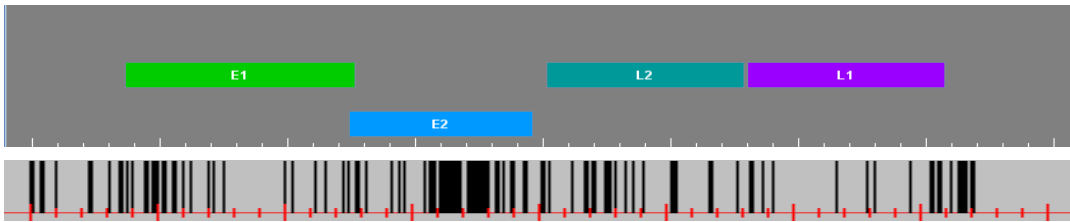

### HPV 15

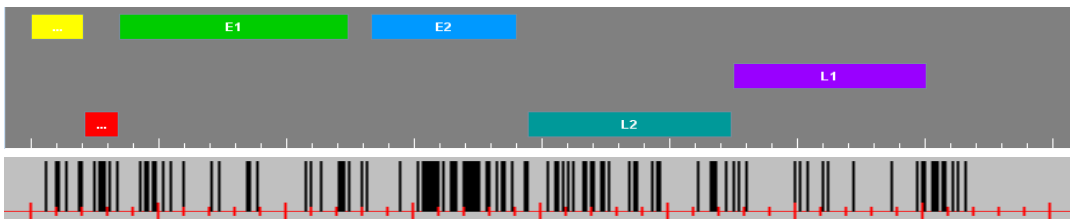

### HPV 16

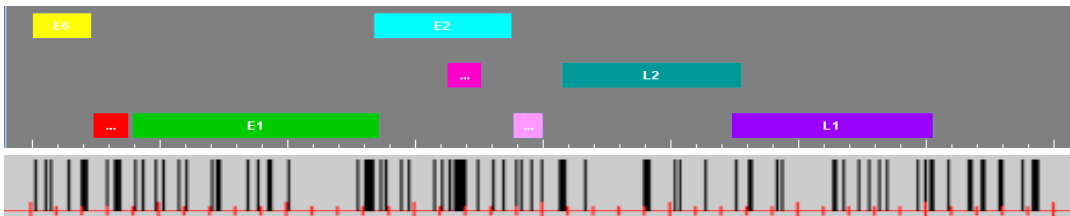

### HPV 17

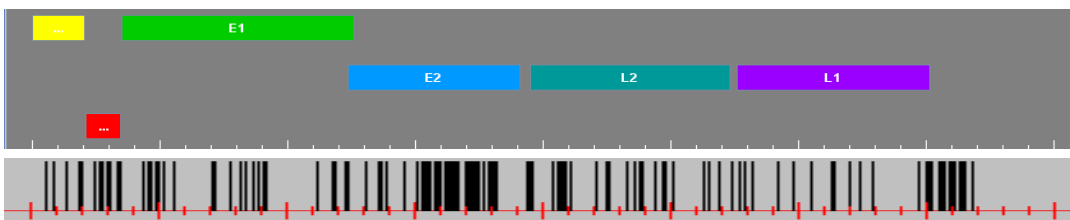

### HPV 18

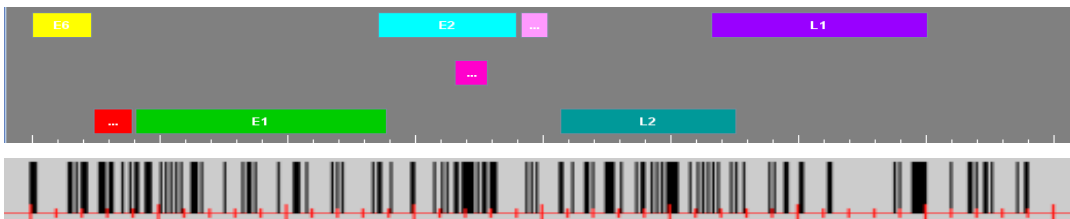

### HPV 19

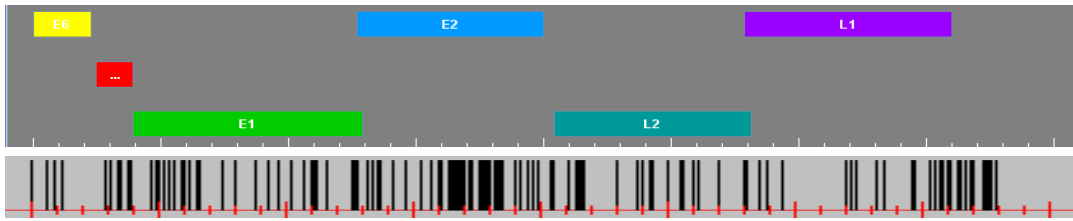

### HPV 20

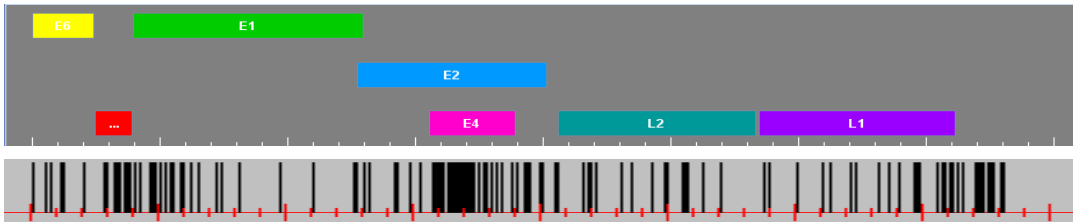

### HPV 21

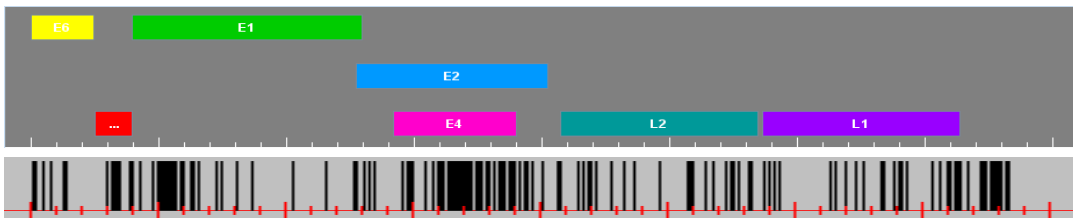

### HPV 22

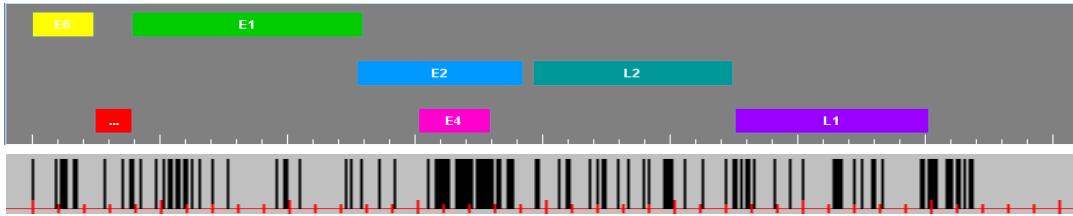

### HPV 23

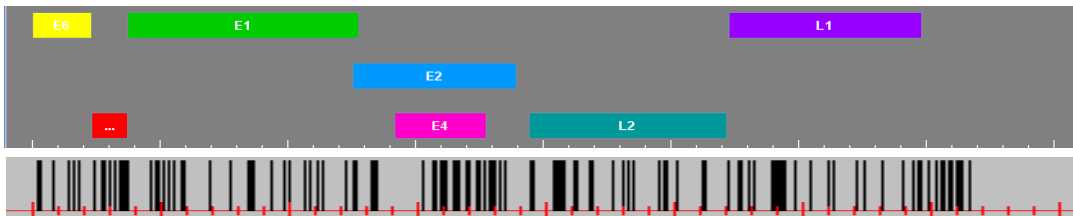

### HPV 24

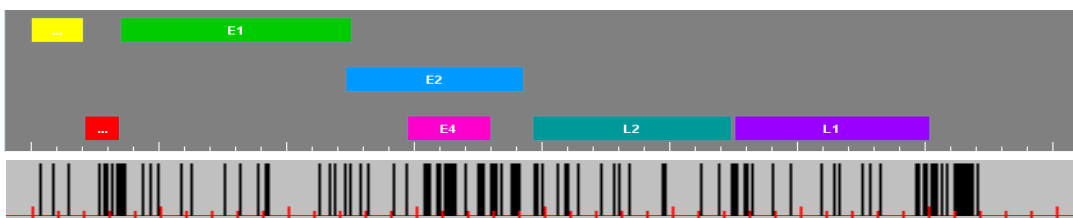

### HPV 25

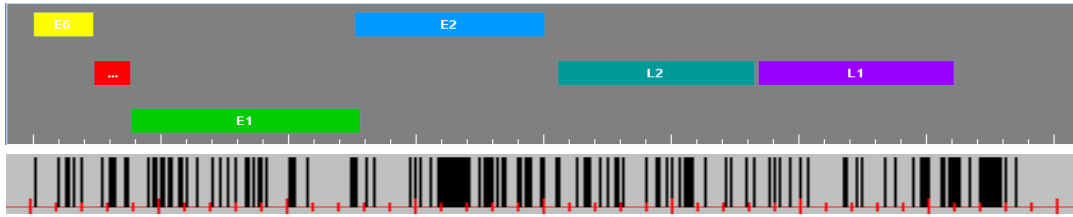

### HPV 26

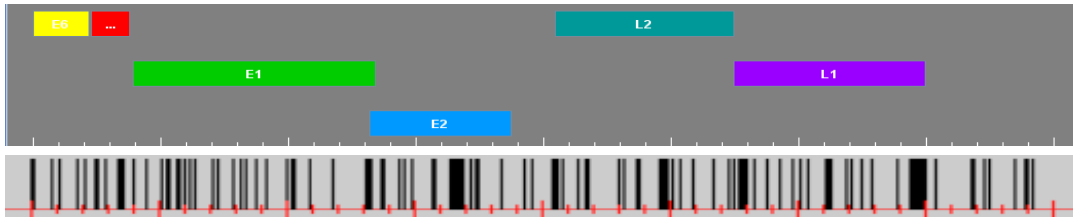

### HPV 27

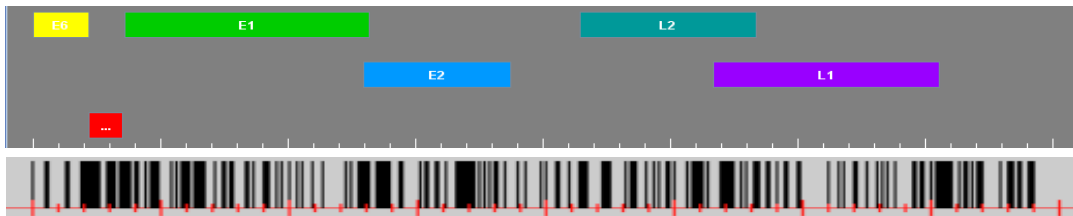

### HPV 28

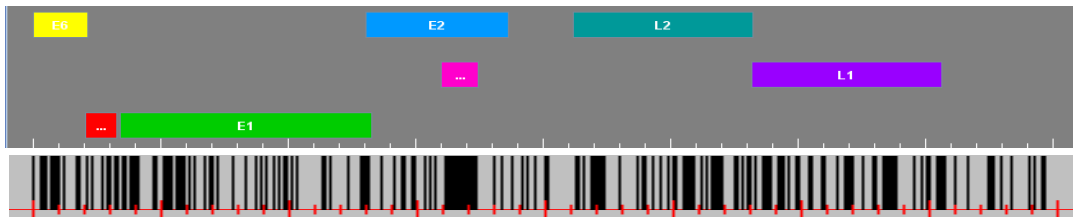

### HPV 29

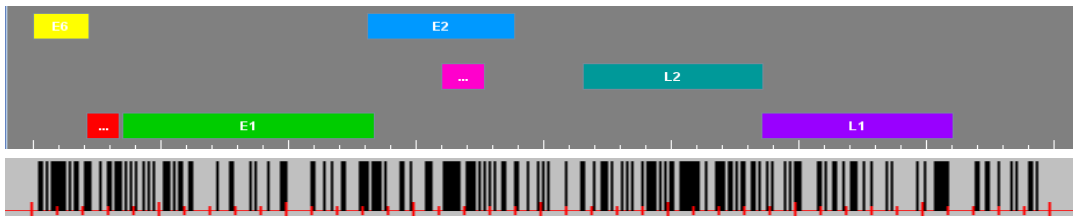

### HPV 30

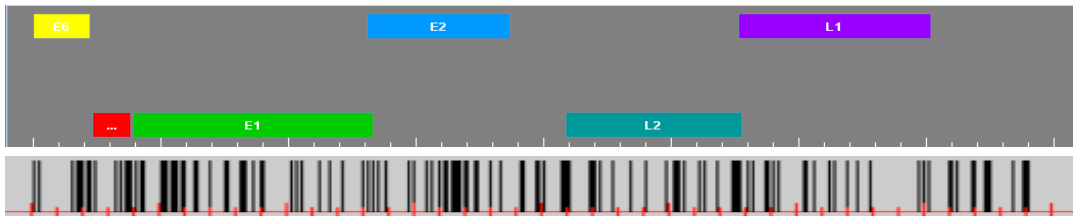

### HPV 31

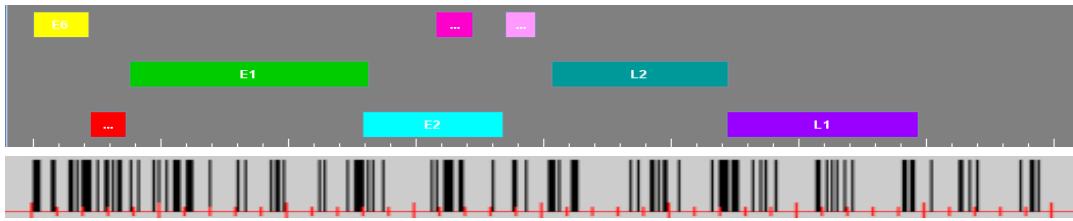

### HPV 32

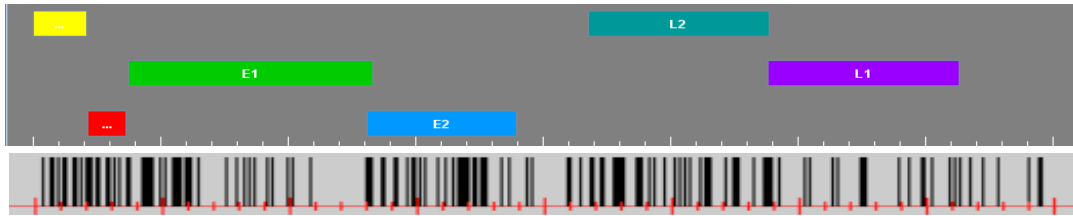

### HPV 33

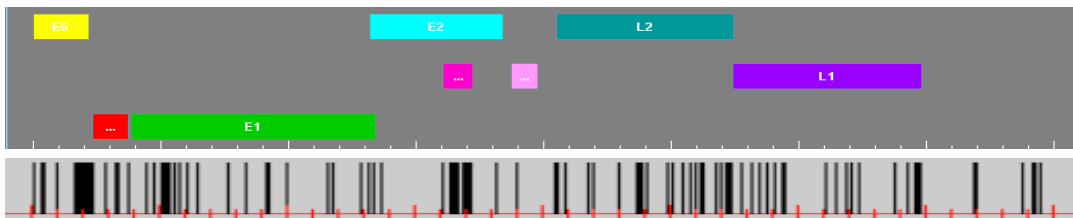

### HPV 34

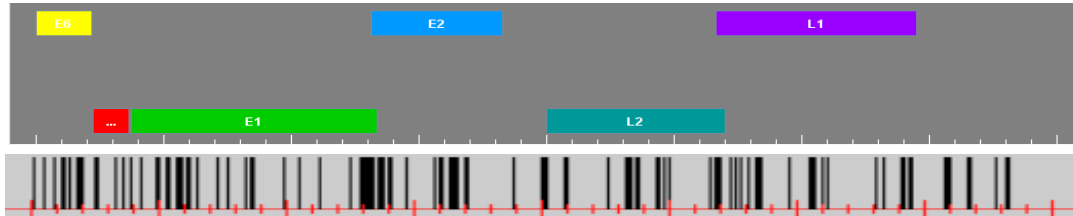

### HPV 35

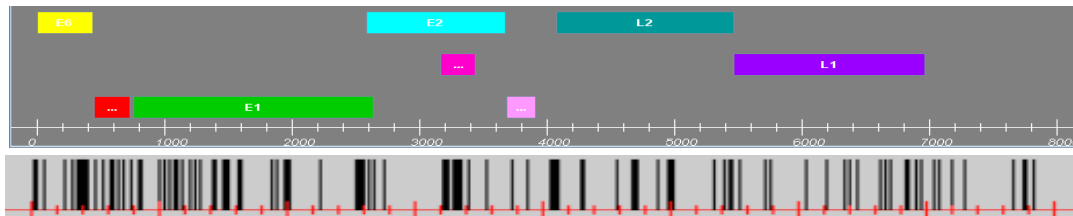

### HPV 36

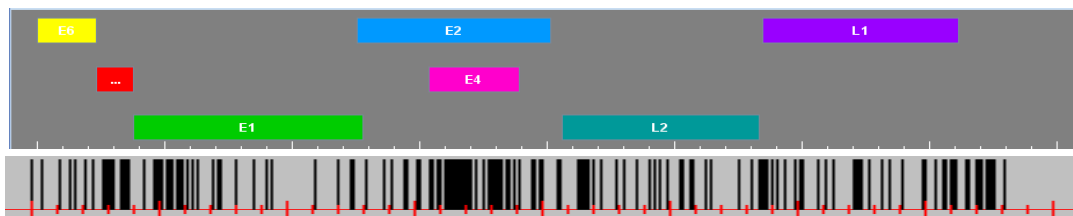

### HPV 37

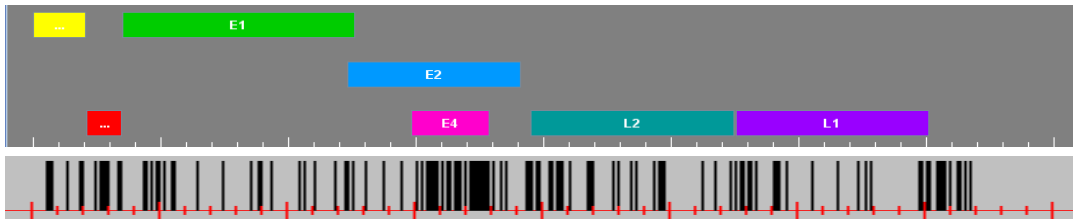

### HPV 38

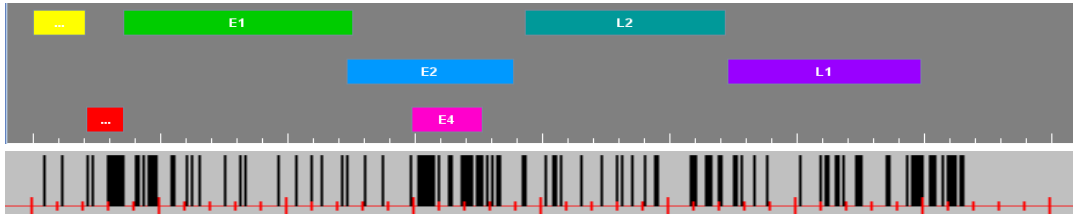

### HPV 39

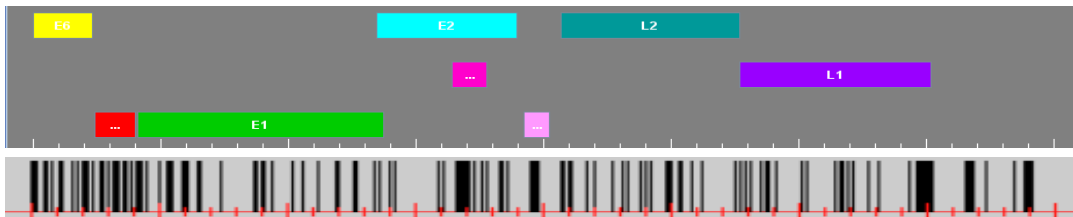

### HPV 40

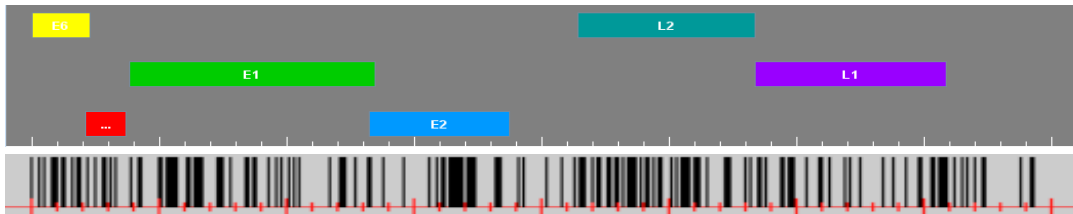

### HPV 41

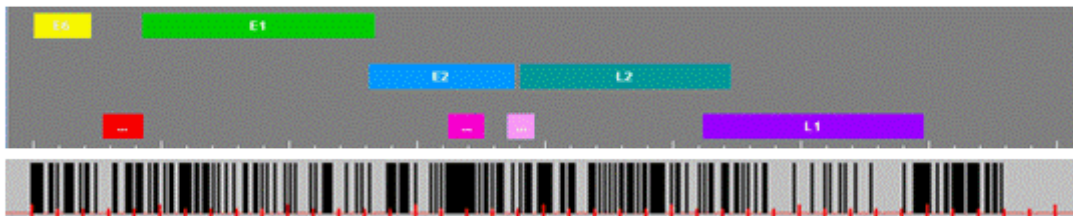

### HPV 42

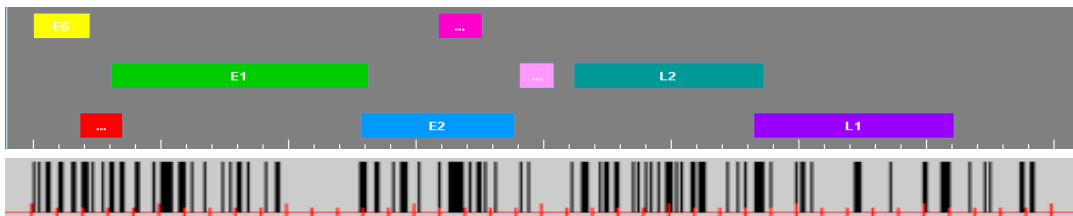

### HPV 43

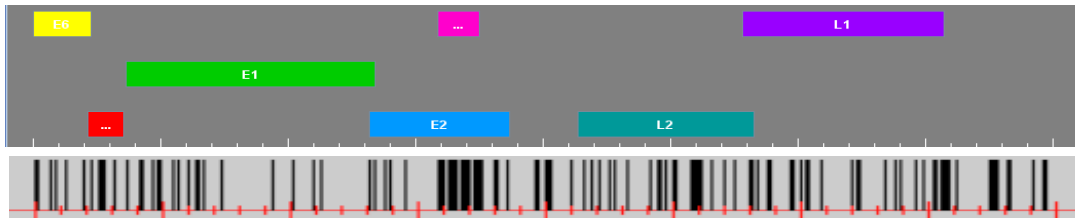

### HPV 44

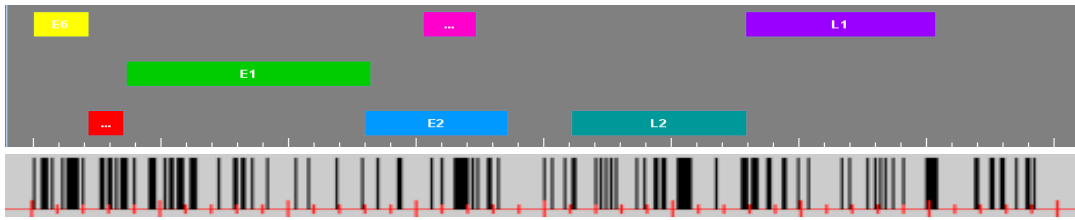

### HPV 45

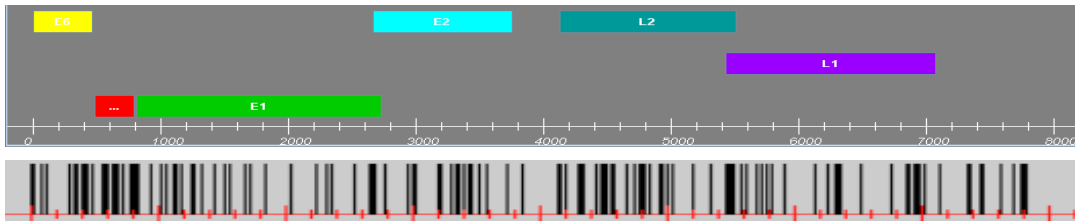

### HPV 47

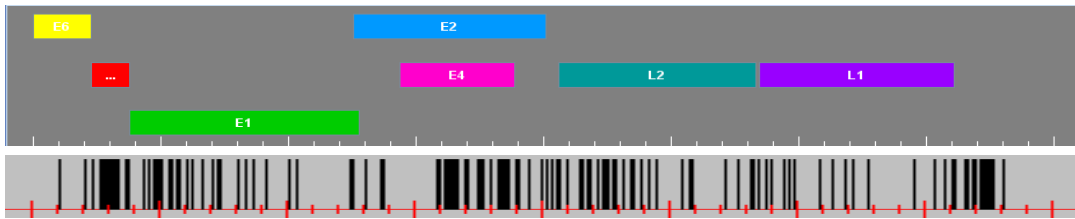

### HPV 48

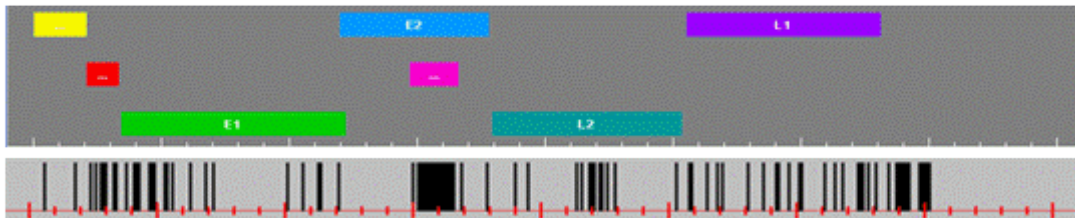

### HPV 49

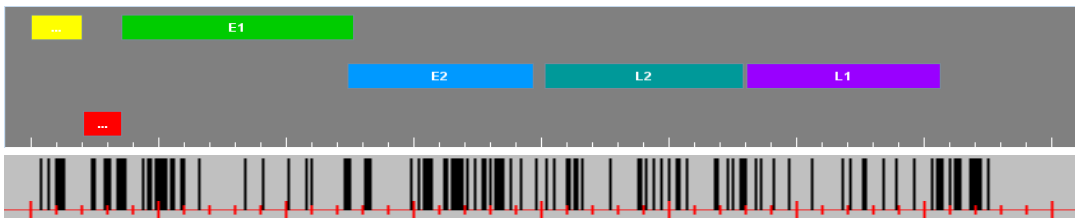



### HPV 50

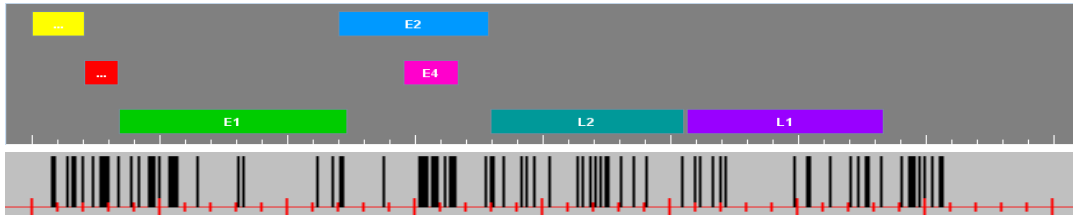

### HPV 51

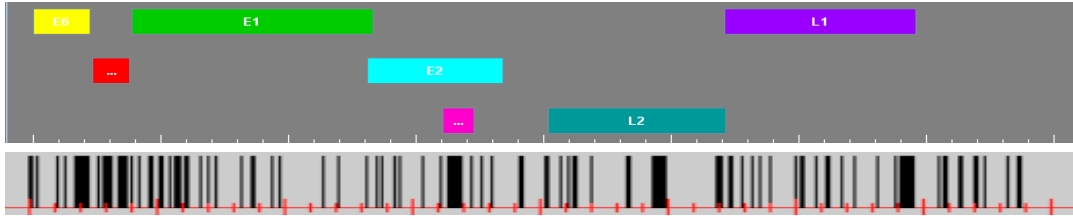

### HPV 52

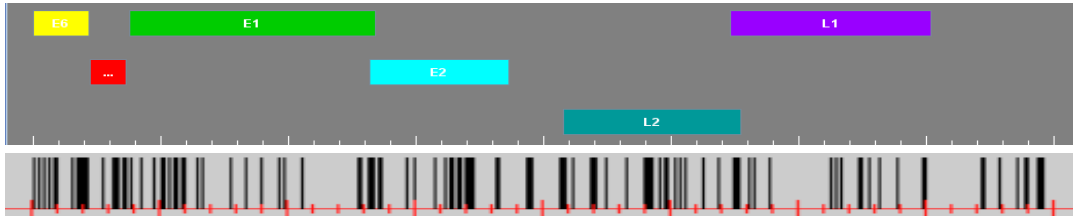

### HPV 53

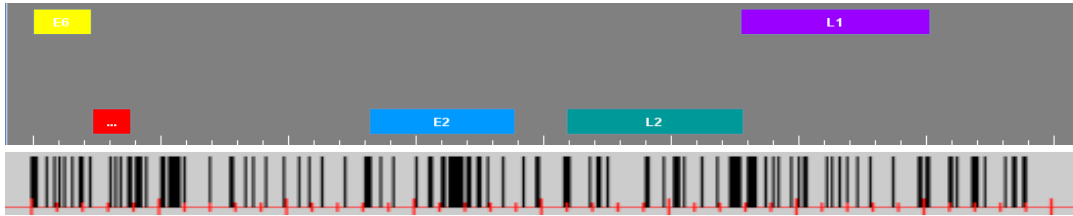

### HPV 54

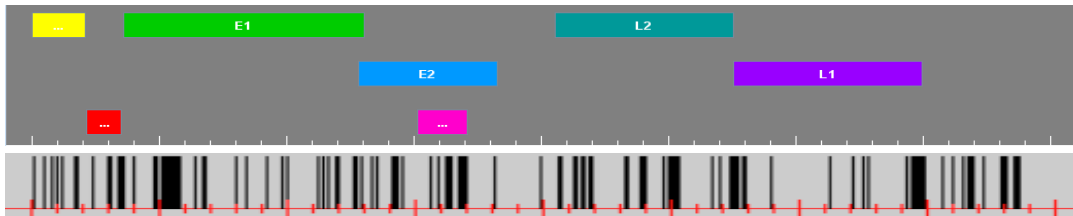

### HPV 55

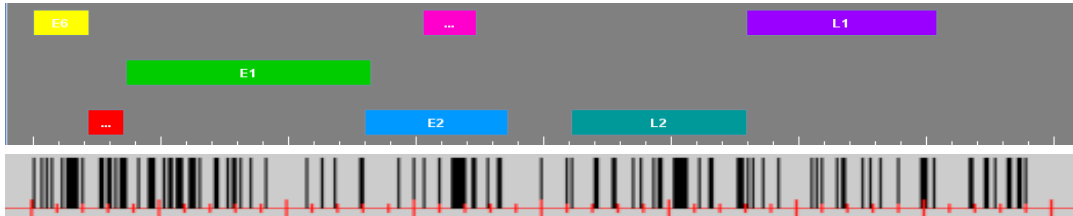

### HPV 56

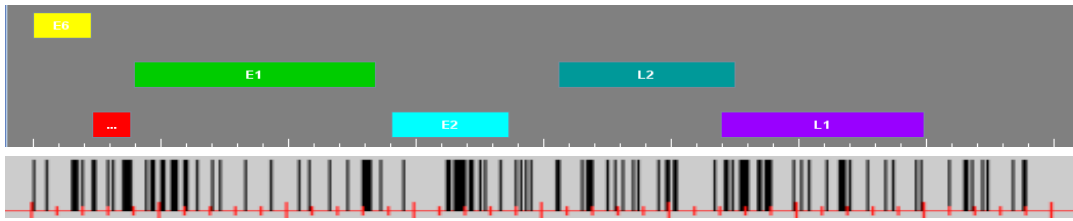

### HPV 57

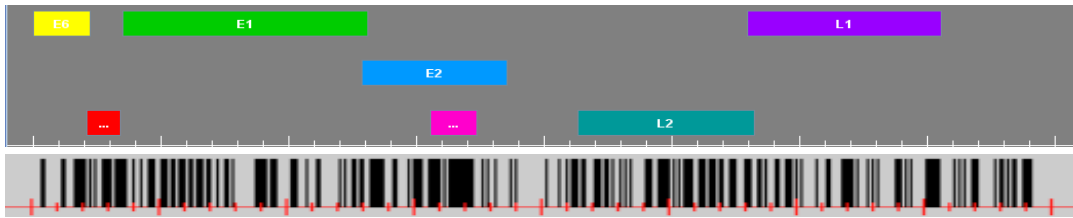

### HPV 58

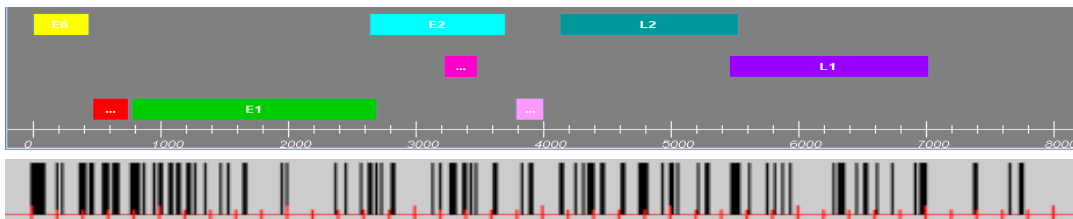

### HPV 59

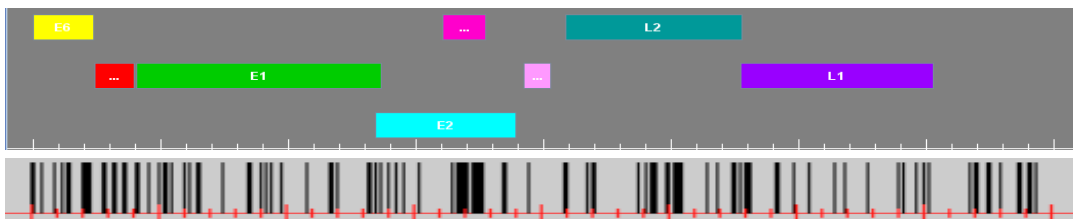

### HPV 60

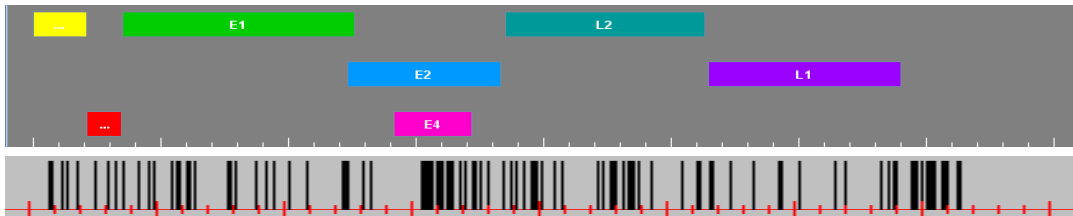

### HPV 61

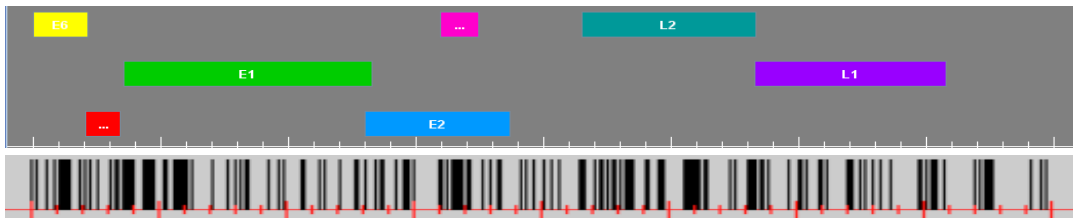

### HPV 62

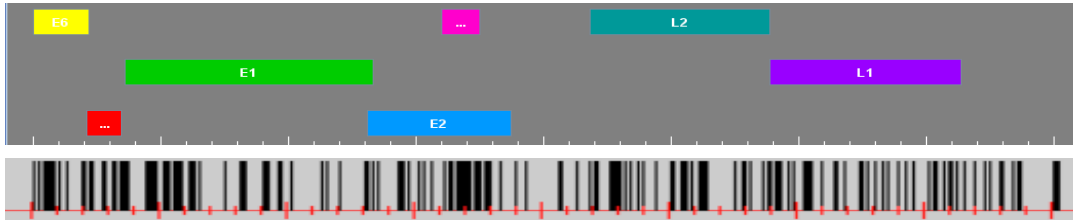

### HPV 63

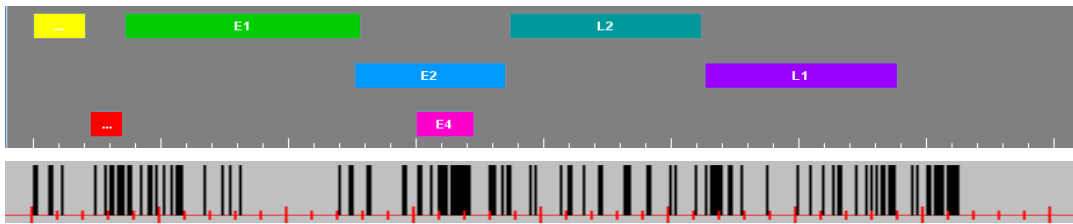

### HPV 65

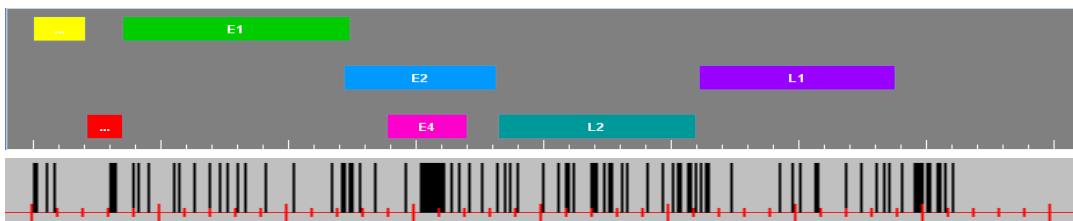

### HPV 66

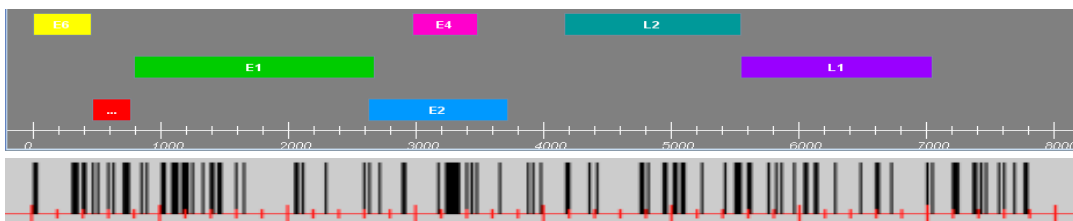

### HPV 67

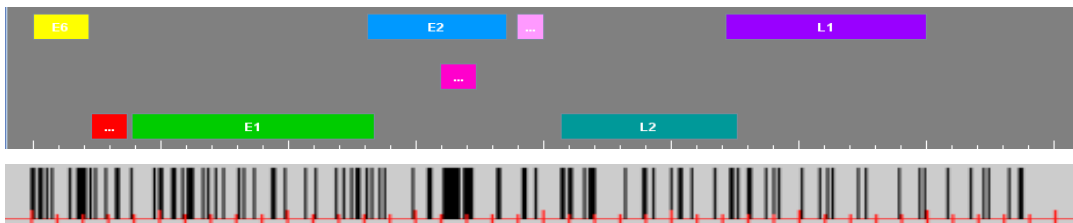

### HPV 68

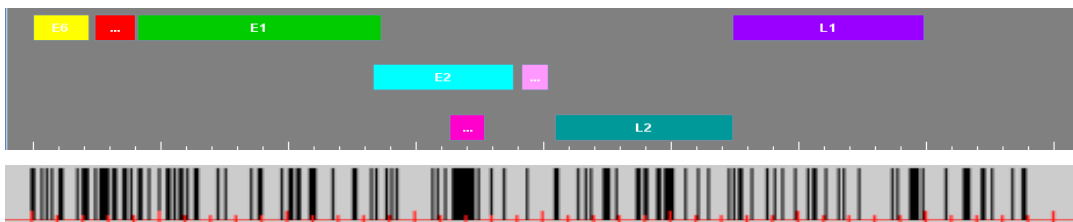

### HPV 69

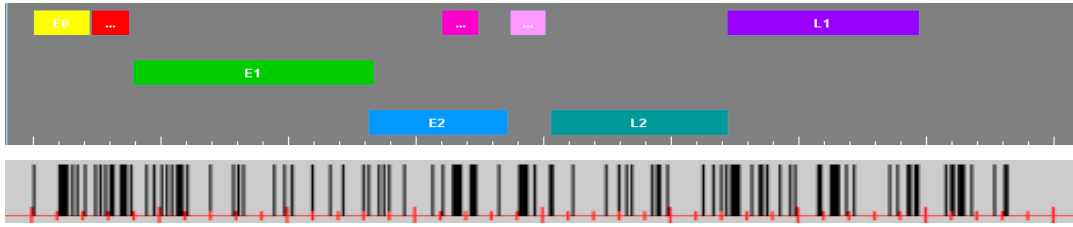

### HPV 70

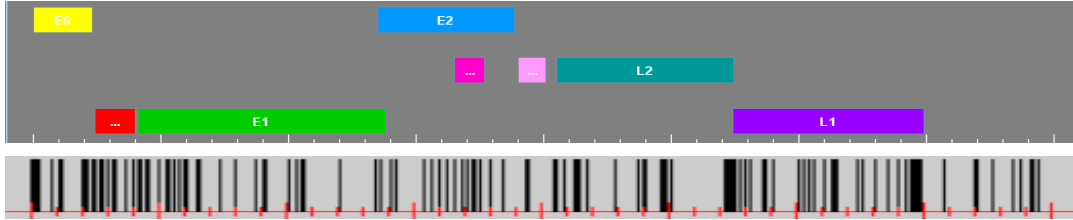

### HPV 71

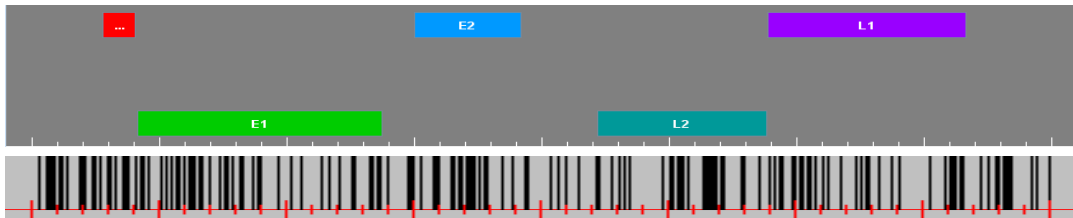

### HPV 72

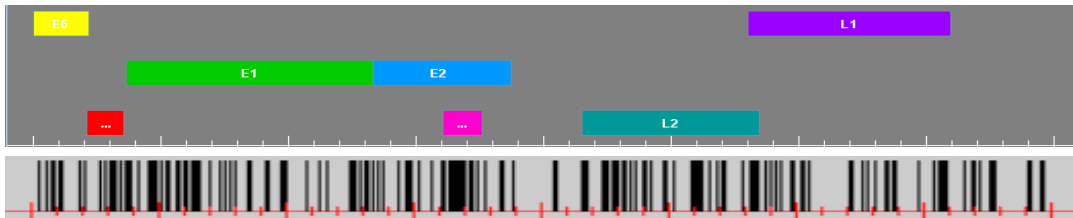

### HPV 73

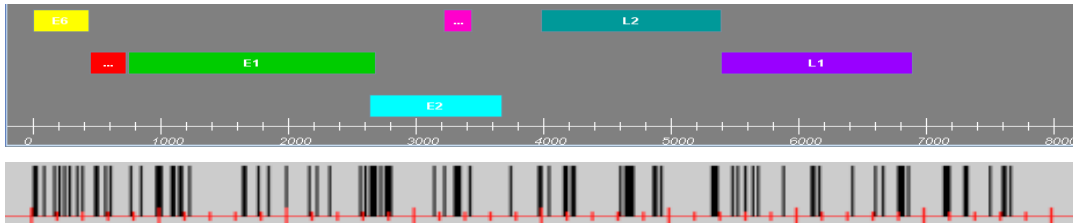

### HPV 74

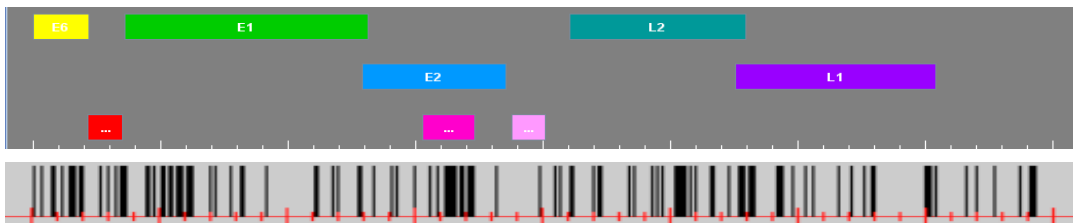

### HPV 75

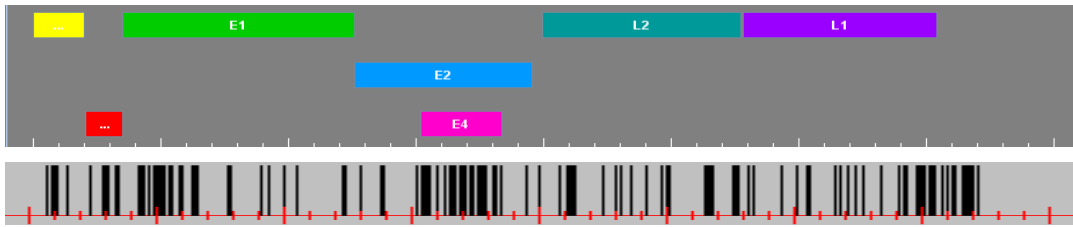

### HPV 76

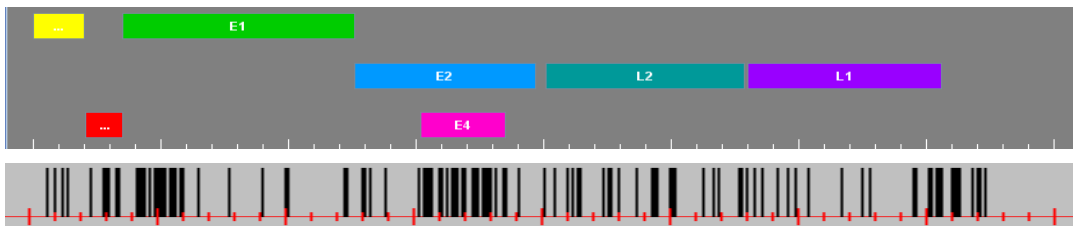

### HPV 77

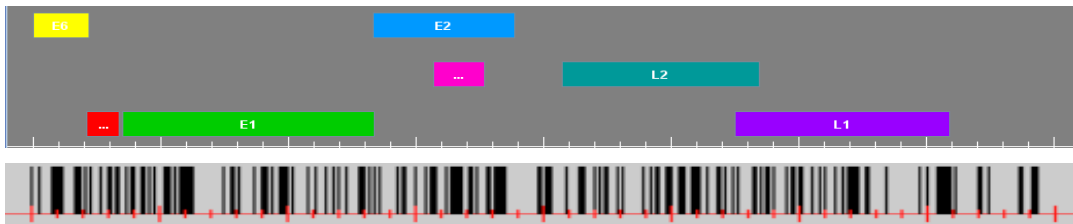

### HPV 80

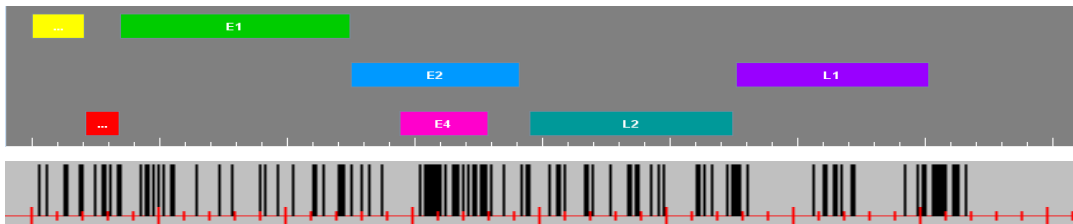

### HPV 81

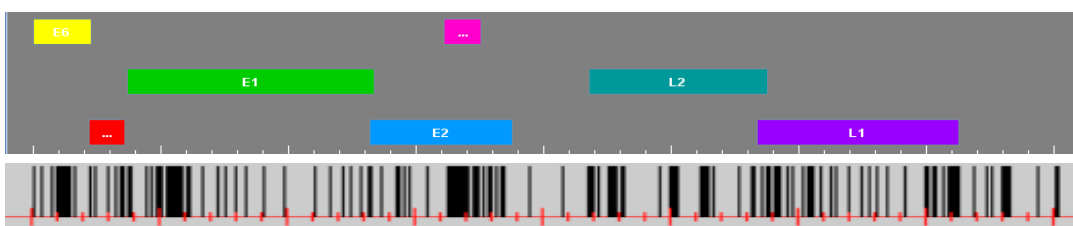

### HPV 82

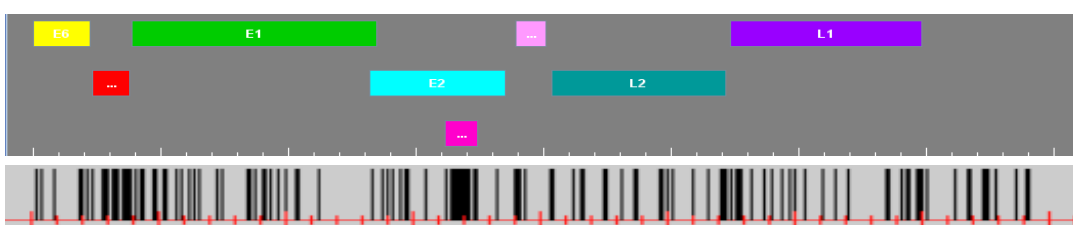

### HPV 83

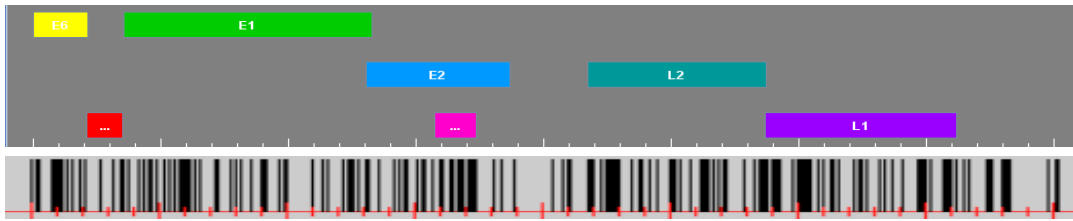

### HPV 84

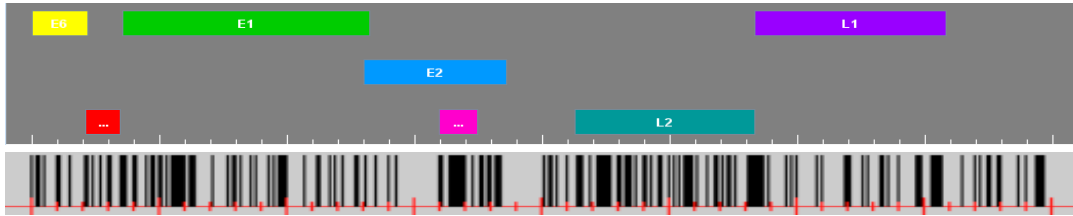

### Cand HPV 85

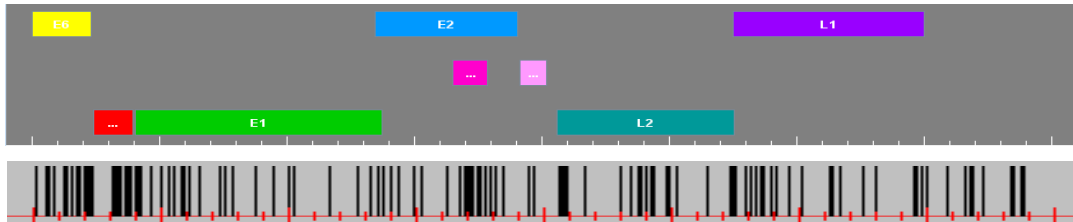

### HPV 86

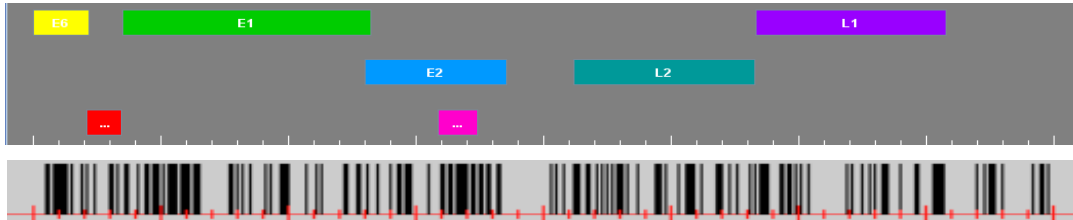

### HPV 87

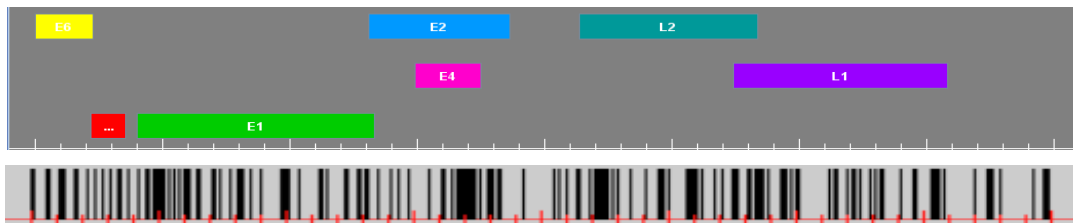

### HPV 88

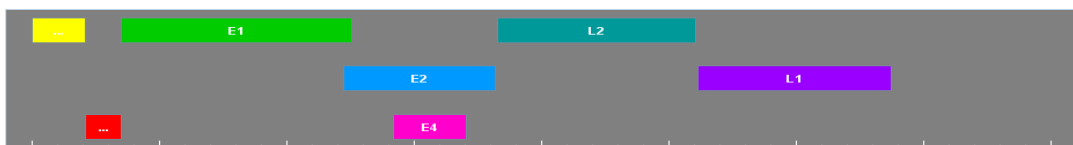

### HPV 89

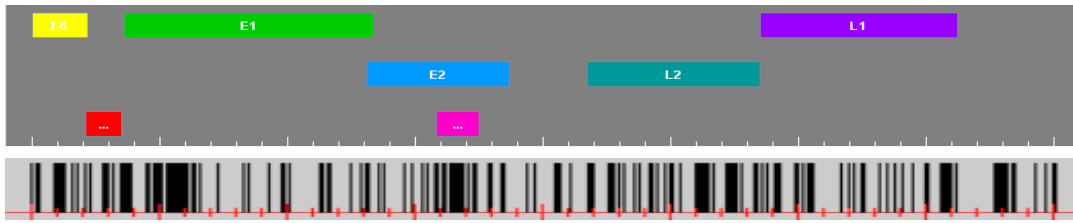

### HPV 90

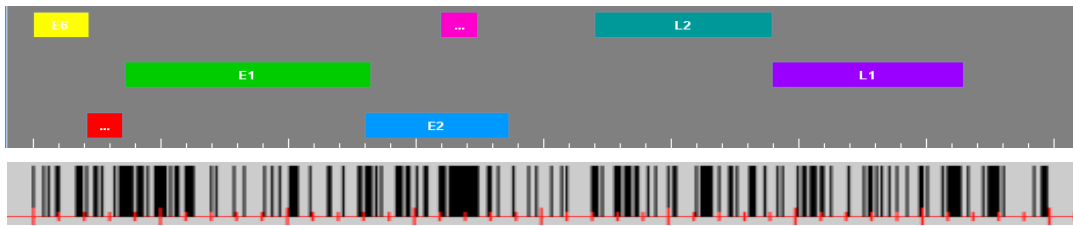

### HPV 92

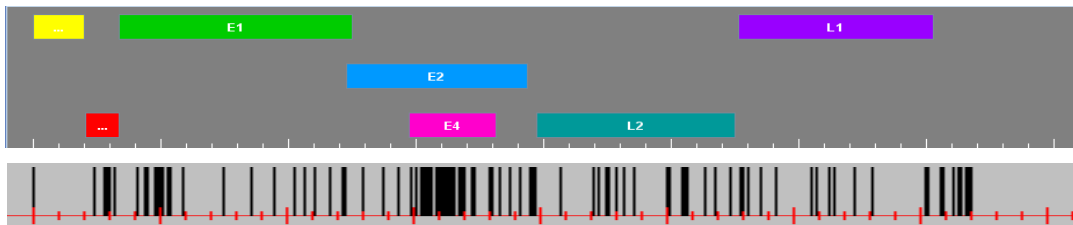

### HPV 93

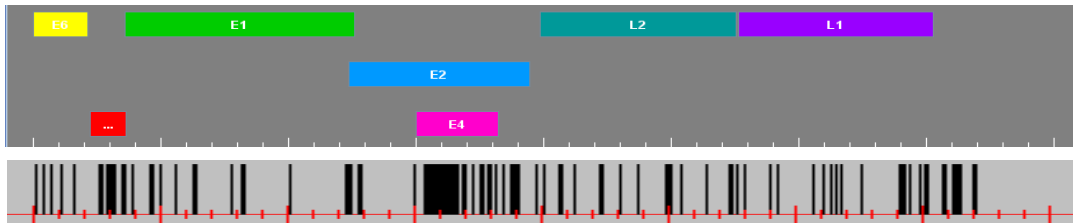

### HPV 94

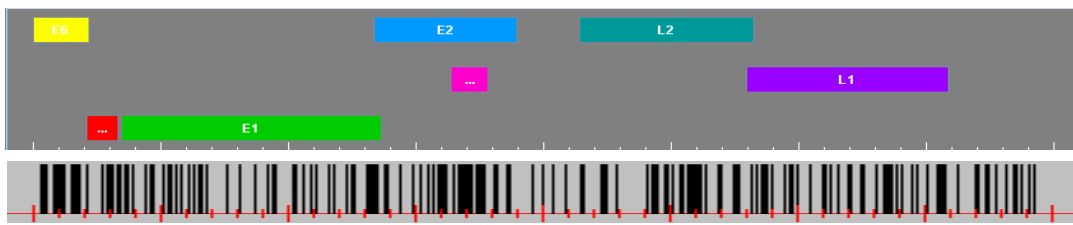

### HPV 95

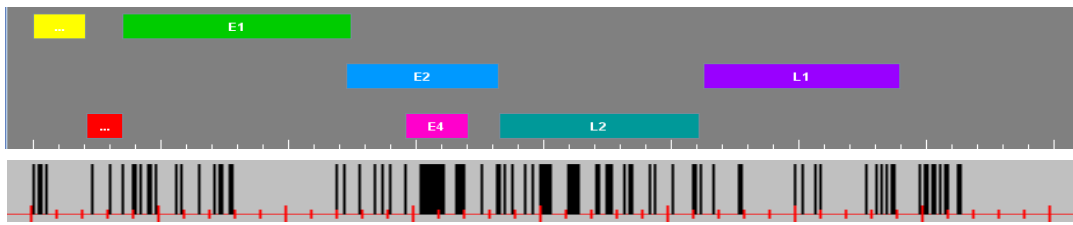

# HPV 96

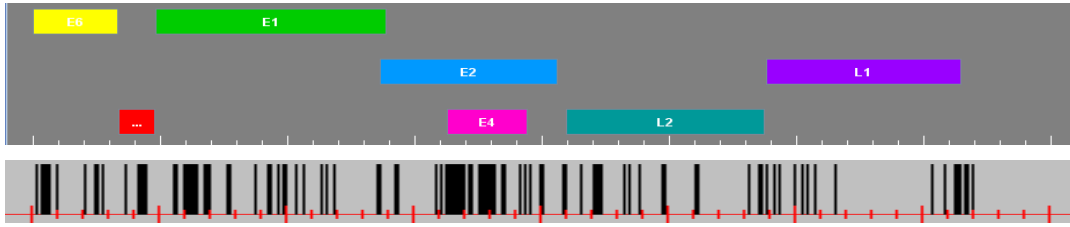

Supplement: Supplementaryfile4.pdf [file Supplementaryfile4.pdf]
