# Supplementary material for: PISMA: A Visual Representation of Motif Distribution in DNA Sequences
Source: PubMed Central journal article supplement — Bioinform Biol Insights. 2017 Mar 30;11:1177932217700907. doi: 10.1177/1177932217700907 (PMC5390925; doi:10.1177/1177932217700907), 2017-03-30
Supplement: Supplementaryfile3.pdf [file Supplementaryfile3.pdf]

Search's algorithm of Pisma

Pisma search's algorithm function

Summary of the "Search" function

The first thing this function does is read the file in which the information to be processed is stored. The file name is stored in the global variable "nomArch". The buffer that is associated with the reading of the file is stored in the variable "input". Events will only be executed if the file exists. In any case this does not exist, an error message will be sent to the console. The first thing that is done in this process is to get the number of characters the file contains. This is stored in the variable "max". Also, store the values of the file inside the "letter" vector. The first of the three processes is based on this search algorithm, it is in charge of eliminating all the characters that should not appear. Each character contained in "letter" will be copied against each of the four possibilities (A, T, G and C). In the case that a match is not confirmed, this character is removed from the list. In the diagram (1) the generalized behavior of this one is shown. This makes use of a function called 'Mayuscula' that transforms the character that receives in its corresponding upper case.

The second part of the algorithm is responsible for separating all the characters that were received in strings of 100 characters. For this a '\ n' character is applied every 100 values. A character vector is then converted to a single word using the toString function (whose Java equivalent is copyValueOf). An evaluation of the phrase is also performed in order for the character '\ n' to be used as a line break. This is in charge 'Evaluate' command (whose equivalence in Java is trim). In the diagram (2) the generalized behavior of this one is shown.

The third part that makes up this function searches for the pattern contained in the vector 'string'. To do this, it looks for the first value to match any of the characters of the word contained in 'letter'. In case of coincidence it is continued with the search of the rest of the values. In the diagram (3) the generalized behavior of this one is shown.

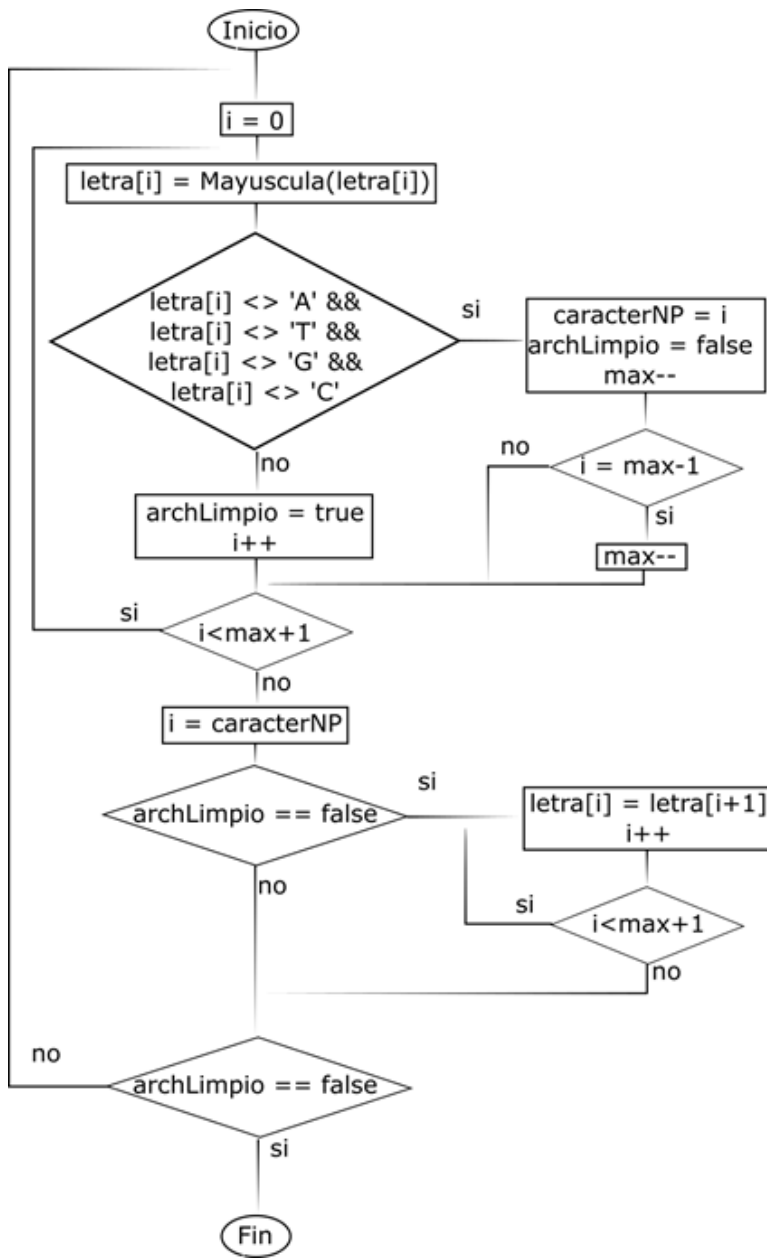

diagram (1)

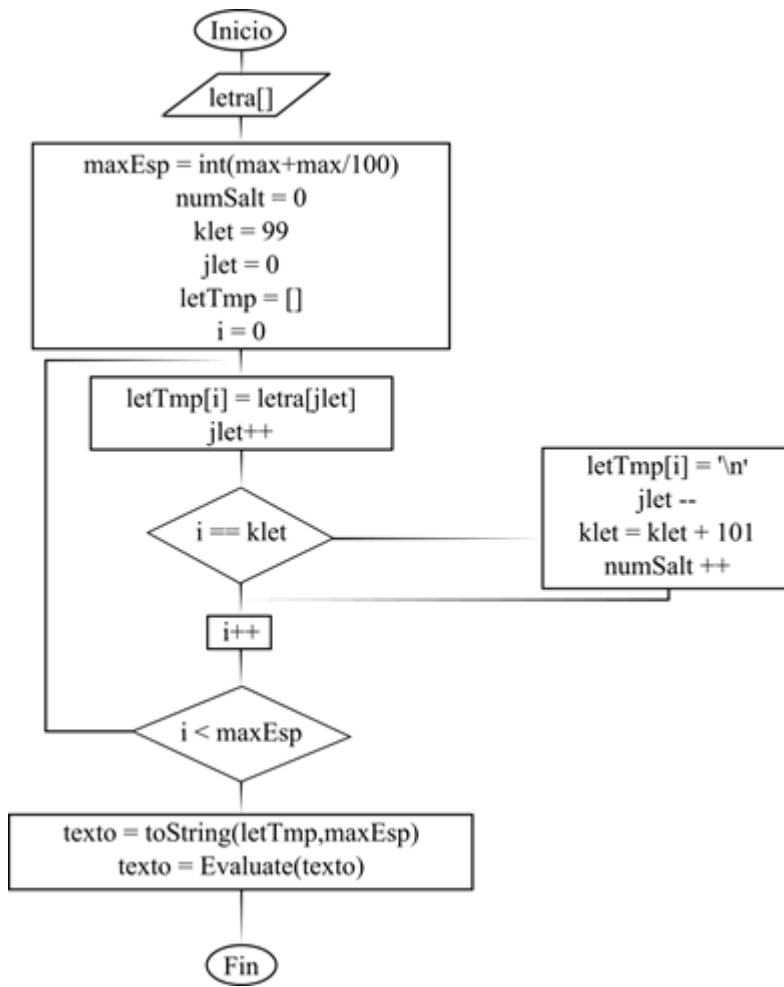

diagram (2)

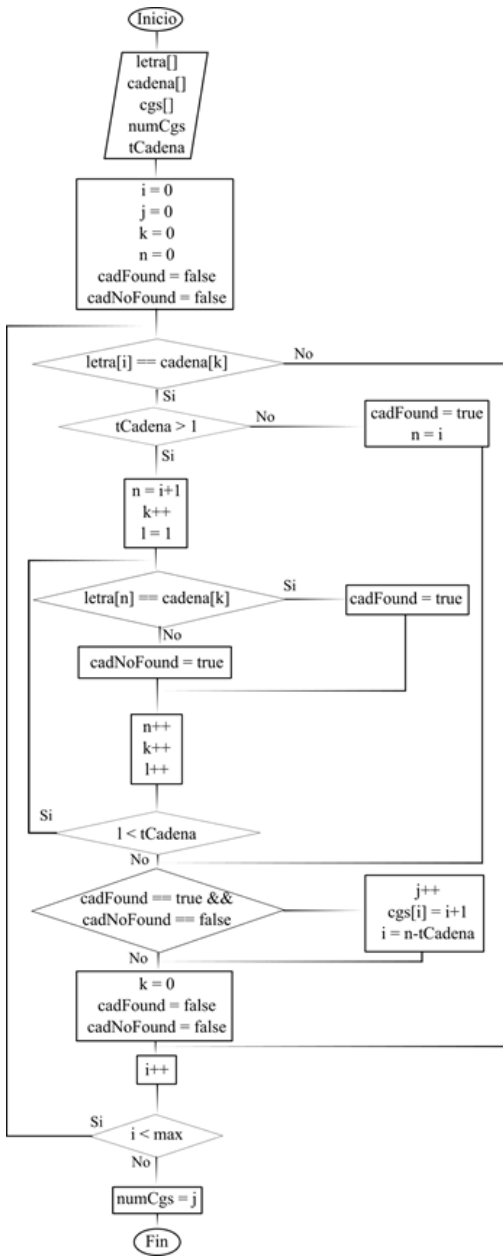

diagram (3)

## Search's function pseudo code

### Global variables

Integer: numCgs  
          tCadena  
          cgs[]  
Character: letra[]  
          cadena[]  
String: nomArchivo

### Local variables

Integer: caracterNP = 0  
          i = 0  
          j = 0  
          k = 0  
          n = 0  
          max = 0  
          maxEsp = 0  
          klet = 99  
          jlet = 0  
Boolean: archLimpio = false  
          cadFound = false  
          cadNotFound = false  
File: F = null  
Character: letTmp[]

### Algorithm

```
F = OpenFile(nomArchivo)
If exists(F) Then
    letra[] = ReadInformation(F)
    While archivoLimpio <> false Do
        max = FileLength(F)
        i = 0
        While i < max+1 Do
            letra[i] = CapitalLetter(letra[i])
            If letra[i] <> 'A' && letra[i] <> 'T' && letra[i] <> 'G' && letra[i] <> 'C' Then
                caracterNP = i
                archivoLimpio = false
                max = max - 1
                If i == max-1 Then
                    max = max - 1
                EndIf
            Else
                archLimpio = true
                i = i + 1
            EndIf
        EndWhile
        i = caracterNP
        If archivoLimpio == false Then
            While i < max+1 Do
```

```

        letra[i] = letra[i+1]
        i = i + 1
    EndWhile
EndIf
EndWhile
maxEsp = BecomeInteger(max+max/100)
letTmp[] = VectorCharacter(maxEsp)
i = 0
While i < maxEsp Do
    letTmp[i] = letra[jlet]
    jlet = jlet + 1
    If i == klet Then
        letTmp[i] = '\n'
        jlet = jlet - 1
        klet = klet + 101
        numSalt = numSalt + 1
    EndIf
    i = i + 1
EndWhile
texto = BecomeString(letTmp,maxEsp)
texto = Evaluate(texto)
i = 0
While i < max Then
    If letra[i] == cadena[k] Then
        If tCadena > 1 Then
            n = i + 1
            k = k + 1
            l = 1
            While l < tCadena Do
                If letra[n] == cadena[k] Then
                    cadFound = true
                Else
                    cadNoFound = true
                EndIf
                n = n + 1
                k = k + 1
                l = l + 1
            EndWhile
        Else
            cadFound = true
            n = i
        EndIf
        If cadFound == true && cadNoFound == false Then
            j = j + 1
            cgs[i] = i + 1
            i = n - tCadena
        EndIf
        k = 0
        cadFound = false
        cadNoFound = false
    EndIf
    i = i + 1
EndWhile

```

```
    numCgs = j
    CerrarArchivo(F)
Endif
```
